# Supplementary material for: Use of Different Food Classification Systems to Assess the Association between Ultra-Processed Food Consumption and Cardiometabolic Health in an Elderly Population with Metabolic Syndrome (PREDIMED-Plus Cohort)
Source: MDPI journal article supplement (doi:10.3390/nu13072471), 2021-07-20
Supplement: s1 [file s1]

**Table S1.** List of food items from the PREDIMED-Plus food frequency questionnaire (FFQ) and their group allocation according to each classification system.

| FOOD ITEM                            | NOVA | IARC | IFIC | UNC |
|--------------------------------------|------|------|------|-----|
| Whole milk                           | 1    | 4    | 1    | 1   |
| Semi-skimmed milk                    | 1    | 4    | 1    | 1   |
| Skimmed-milk                         | 1    | 4    | 1    | 1   |
| Condensed milk                       | 3    | 4    | 3    | 4   |
| Cream                                | 3    | 4    | 3    | 1   |
| Industrially-produced milkshakes     | 4    | 4    | 4    | 4   |
| Whole-milk yogurt                    | 1    | 4    | 4    | 3   |
| Skimmed-milk yogurt                  | 1    | 4    | 4    | 3   |
| Flavored Petit Suisse yogurt         | 4    | 4    | 4    | 4   |
| Cottage cheese, curd                 | 3    | 4    | 4    | 4   |
| Processed soft cheese wedges         | 4    | 4    | 3    | 4   |
| Cured or semi-cured cheese           | 3    | 4    | 3    | 4   |
| Fresh cheese                         | 3    | 4    | 3    | 4   |
| Custard, crème caramel flan, pudding | 4    | 4    | 4    | 7   |
| Ice-cream                            | 4    | 4    | 4    | 7   |
| Eggs                                 | 1    | 3    | 1    | 1   |
| Skin chicken                         | 1    | 3    | 1    | 1   |
| Skinless chicken                     | 1    | 3    | 1    | 1   |
| Beef meat                            | 1    | 3    | 1    | 1   |
| Pork meat                            | 1    | 3    | 1    | 1   |
| Lamb meat                            | 1    | 3    | 1    | 1   |
| Rabbit meat                          | 1    | 3    | 1    | 1   |
| Liver                                | 1    | 3    | 1    | 1   |
| Offal                                | 1    | 3    | 1    | 1   |
| Serrano ham                          | 3    | 4    | 4    | 7   |
| Sandwich (deli) ham                  | 4    | 4    | 4    | 7   |
| Cured cold meats                     | 4    | 4    | 4    | 7   |
| Pâté                                 | 4    | 4    | 4    | 6   |
| Burger                               | 4    | 4    | 5    | 7   |
| Bacon, marbling                      | 3    | 4    | 4    | 4   |
| White fish                           | 1    | 3    | 1    | 1   |
| Blue fish                            | 1    | 3    | 1    | 1   |
| Salted cod                           | 3    | 4    | 2    | 4   |
| Oysters, mussels and clams           | 1    | 3    | 1    | 1   |
| Calamari, octopus, baby cuttlefish   | 1    | 3    | 1    | 1   |
| Shrimp, prawn, lobster               | 1    | 3    | 1    | 1   |
| Canned fish in water                 | 3    | 4    | 2    | 4   |
| Canned fish in oil                   | 3    | 4    | 2    | 4   |
| Chard, spinach                       | 1    | 3    | 1    | 1   |
| Cabbage, cauliflower, broccoli       | 1    | 3    | 1    | 1   |
| Lettuce, chicory (endive), escarole  | 1    | 1    | 1    | 1   |
| Tomato                               | 1    | 1    | 1    | 1   |
| Carrots, pumpkin, squash             | 1    | 3    | 1    | 1   |
| Flat green (Romano) beans            | 1    | 3    | 1    | 1   |
| Zucchini, eggplant, cucumber         | 1    | 3    | 1    | 1   |
| Pepper                               | 1    | 3    | 1    | 1   |
| Canned white asparagus               | 3    | 2    | 2    | 3   |
| Gazpacho (cold Spanish tomato soup)  | 1    | 3    | 1    | 1   |
| Other vegetables                     | 1    | 3    | 1    | 1   |
| Onions                               | 1    | 3    | 1    | 1   |
| Garlic                               | 1    | 3    | 1    | 1   |
| Packaged potato crisps/chips         | 4    | 4    | 4    | 7   |

**Table S1. Continued**

| <b>FOOD ITEM</b>                            | <b>NOVA</b> | <b>IARC</b> | <b>IFIC</b> | <b>UNC</b> |
|---------------------------------------------|-------------|-------------|-------------|------------|
| <b>Homemade French fries/chips</b>          | 3           | 3           | 1           | 4          |
| <b>Boiled/baked potatoes</b>                | 1           | 3           | 1           | 1          |
| <b>Mushrooms</b>                            | 1           | 3           | 1           | 1          |
| <b>Oranges, clementines, grapefruit</b>     | 1           | 1           | 1           | 1          |
| <b>Bananas</b>                              | 1           | 1           | 1           | 1          |
| <b>Apples, pears</b>                        | 1           | 1           | 1           | 1          |
| <b>Strawberries</b>                         | 1           | 1           | 1           | 1          |
| <b>Cherries, plums</b>                      | 1           | 1           | 1           | 1          |
| <b>Peach, apricot, nectarine</b>            | 1           | 1           | 1           | 1          |
| <b>Watermelon</b>                           | 1           | 1           | 1           | 1          |
| <b>Melon</b>                                | 1           | 1           | 1           | 1          |
| <b>Kiwi</b>                                 | 1           | 1           | 1           | 1          |
| <b>Grapes</b>                               | 1           | 1           | 1           | 1          |
| <b>Olives</b>                               | 3           | 4           | 2           | 4          |
| <b>Canned fruit in juice or syrup</b>       | 3           | 4           | 2           | 4          |
| <b>Raisins</b>                              | 1           | 2           | 2           | 1          |
| <b>Toasted almonds</b>                      | 1           | 2           | 1           | 1          |
| <b>Salted pistachios</b>                    | 3           | 4           | 1           | 4          |
| <b>Walnuts</b>                              | 1           | 2           | 1           | 1          |
| <b>Salted/fried nuts</b>                    | 3           | 4           | 1           | 4          |
| <b>Lentils</b>                              | 1           | 3           | 1           | 1          |
| <b>Dried beans</b>                          | 1           | 3           | 1           | 1          |
| <b>Chickpeas</b>                            | 1           | 3           | 1           | 1          |
| <b>Peas and beans</b>                       | 1           | 3           | 1           | 1          |
| <b>White and sliced bread</b>               | 3           | 4           | 3           | 7          |
| <b>Wholemeal bread</b>                      | 3           | 4           | 3           | 5          |
| <b>Breakfast cereals</b>                    | 4           | 4           | 3           | 7          |
| <b>Muesli, wholemeal cereals</b>            | 1           | 4           | 3           | 1          |
| <b>White rice</b>                           | 1           | 4           | 1           | 3          |
| <b>Wholemeal rice</b>                       | 1           | 3           | 1           | 1          |
| <b>Spaghetti, macaroni, Spanish noodles</b> | 1           | 4           | 1           | 3          |
| <b>Wholemeal pasta</b>                      | 1           | 4           | 1           | 2          |
| <b>Pizza</b>                                | 4           | 4           | 5           | 7          |
| <b>Refined olive oil</b>                    | 2           | 4           | 2           | 2          |
| <b>Extra virgin olive oil</b>               | 2           | 2           | 2           | 2          |
| <b>Olive pomace oil</b>                     | 2           | 4           | 2           | 2          |
| <b>Corn (maize) oil</b>                     | 2           | 4           | 2           | 2          |
| <b>Sunflower oil</b>                        | 2           | 4           | 2           | 2          |
| <b>Soybean oil</b>                          | 2           | 4           | 2           | 2          |
| <b>Mixed oil</b>                            | 2           | 4           | 2           | 2          |
| <b>Margarine</b>                            | 4           | 4           | 3           | 6          |
| <b>Butter</b>                               | 2           | 4           | 3           | 4          |
| <b>Lard (animal fat)</b>                    | 2           | 4           | 3           | 6          |
| <b>Biscuits</b>                             | 4           | 4           | 4           | 7          |
| <b>Wholemeal biscuits</b>                   | 4           | 4           | 4           | 7          |
| <b>Chocolate biscuits</b>                   | 4           | 4           | 4           | 7          |
| <b>Homemade baking products</b>             | 3           | 3           | 3           | 6          |
| <b>Industrially-produced confectionery</b>  | 4           | 4           | 4           | 7          |
| <b>Donuts</b>                               | 4           | 4           | 4           | 7          |
| <b>Muffins, cupcakes</b>                    | 4           | 4           | 4           | 7          |
| <b>Industrially-produced cakes</b>          | 4           | 4           | 4           | 7          |
| <b>Churros</b>                              | 4           | 4           | 4           | 7          |
| <b>Chocolates</b>                           | 4           | 4           | 4           | 7          |
| <b>Soluble cocoa powder</b>                 | 4           | 4           | 4           | 4          |
| <b>Nougat</b>                               | 4           | 4           | 4           | 7          |

*Table S1. Continued*

| FOOD ITEM                     | NOVA | IARC | IFIC | UNC |
|-------------------------------|------|------|------|-----|
| Marzipan, shortbread biscuits | 4    | 4    | 4    | 6   |
| Croquettes                    | 4    | 4    | 4    | 7   |
| Instant soup                  | 4    | 4    | 3    | 7   |
| Mustard                       | 4    | 4    | 3    | 6   |
| Mayonnaise                    | 4    | 4    | 3    | 6   |
| Tomato sauce, Ketchup         | 4    | 4    | 3    | 6   |
| Table salt                    | 2    | 4    | 2    | 2   |
| Jam                           | 4    | 4    | 4    | 4   |
| Sugar                         | 2    | 4    | 3    | 2   |
| Honey                         | 2    | 1    | 3    | 1   |
| Packaged snacks               | 4    | 4    | 4    | 7   |
| Soft drinks                   | 4    | 4    | 4    | 7   |
| No-added sugar drinks         | 4    | 4    | 4    | 7   |
| Natural orange juice          | 1    | 1    | 2    | 2   |
| Fruit juice                   | 1    | 1    | 2    | 2   |
| Bottled juice                 | 4    | 4    | 4    | 4   |
| Decaf coffee                  | 3    | 4    | 1    | 1   |
| Coffee                        | 1    | 4    | 1    | 1   |
| Tea                           | 1    | 3    | 1    | 1   |
| Grape must                    | 3    | 4    | 2    | 4   |
| Rosé wine                     | 3    | 4    | 4    | 7   |
| Muscatel wine                 | 3    | 4    | 4    | 7   |
| Young red wine                | 3    | 4    | 4    | 7   |
| Aged red wine                 | 3    | 4    | 4    | 7   |
| White wine                    | 3    | 4    | 4    | 7   |
| Spanish sparkling wine (cava) | 3    | 4    | 4    | 7   |
| Beer                          | 3    | 4    | 4    | 7   |
| Liquors, anisette             | 4    | 4    | 4    | 7   |
| Whisky, gin, vodka, cognac    | 4    | 4    | 4    | 7   |

**NOVA:** [1] Group 1. Unprocessed and minimally processed foods, [2] Group 2. Processed culinary ingredients, [3] Group 3. Processed foods, [4] Group 4. Ultra-processed food and drink products. **International Agency for Research on Cancer (IARC):** [1] Group 1. Non-processed foods, [2] Group 2.1. Moderately processed foods: No further cooking, [3] Group 2.2. Moderately processed foods: Cooked foods, [4] Group 4. Highly processed foods. **International Food Information Council (IFIC):** [1] Group 1. Minimally processed foods, [2] Group 2. Foods processed for preservation, [3] Group 3. Mixtures of combined ingredients, [4] Group 4. Ready-to-eat processed foods, [5] Group 5. Prepared foods/meals. **University of North Carolina (UNC):** [1] Group 1. Unprocessed/minimally processed foods, [2] Group 2.1. Basic processed foods: Ingredients, [3] Group 2.2. Basic processed foods: Preservation/precooking, [4] Group 3.1. Moderately processed: Flavor, [5] Group 3.2. Moderately processed: Grain products, [6] Group 4.1. Highly processed: Ingredients, [7] Group 4.2. Highly processed: Stand-alone. For some items such as fruit juices, milkshakes, soups, burgers, ice-cream and pizzas, the PREDIMED-Plus FFQ does not specify whether they are home-made or industrially produced. We assumed they were industrially produced, based on the most common form of consumption in the Spanish population and the Mediterranean diet. In the case of yogurts and whole-grain cereals, the FFQ does not distinguish between plain, sweetened or flavored varieties, so they were assumed to be natural and unsweetened.

**Table S2. Mean values of nutritional markers across quintiles of UPF intake according to the NOVA classification.**

|                                          | NOVA quintiles of UPF intake (% of g/day) |                  |                  |                  |                  | p                 |
|------------------------------------------|-------------------------------------------|------------------|------------------|------------------|------------------|-------------------|
|                                          | Q1 (lowest)                               | Q2               | Q3               | Q4               | Q5 (highest)     |                   |
| n                                        | 1128                                      | 1127             | 1127             | 1127             | 1127             |                   |
| UPF consumption (% of g/day)             | 2.03 (0.74)                               | 4.01 (0.52)      | 5.97 (0.65)      | 9.00 (1.17)      | 18.31 (7.54)     | <b>&lt;0.001</b>  |
| Energy intake (kcal/day)                 | 2164.60 (507.67)                          | 2292.38 (509.18) | 2373.33 (538.54) | 2424.60 (541.56) | 2498.50 (600.54) | <b>&lt;0.001*</b> |
| Protein (g/day)                          | 93.98 (20.95)                             | 96.61 (21.56)    | 98.68 (22.10)    | 97.11 (21.51)    | 98.05 (23.58)    | <b>&lt;0.001*</b> |
| Protein (% of energy intake)             | 17.68 (3.05)                              | 17.07 (2.75)     | 16.86 (2.71)     | 16.22 (2.47)     | 15.93 (2.73)     | <b>&lt;0.001*</b> |
| Total fat (g/day)                        | 92.62 (26.32)                             | 100.06 (26.04)   | 104.25 (26.91)   | 108.71 (29.01)   | 111.78 (31.03)   | <b>&lt;0.001*</b> |
| Total fat (% of energy intake)           | 38.55 (7.02)                              | 39.37 (6.34)     | 39.69 (6.33)     | 40.44 (6.55)     | 40.32 (6.36)     | <b>&lt;0.001*</b> |
| Saturated fat (g/day)                    | 21.54 (6.61)                              | 24.58 (7.18)     | 26.43 (7.70)     | 28.06 (8.20)     | 29.85 (9.84)     | <b>&lt;0.001*</b> |
| Saturated fat (% of energy intake)       | 8.96 (1.86)                               | 9.64 (1.77)      | 10.03 (1.90)     | 10.41 (1.90)     | 10.69 (2.11)     | <b>&lt;0.001*</b> |
| Monounsaturated fat (g/day)              | 49.53 (16.21)                             | 52.37 (15.45)    | 53.86 (15.50)    | 55.82 (16.32)    | 56.49 (16.69)    | <b>&lt;0.001*</b> |
| Monounsaturated fat (% of energy intake) | 20.62 (5.10)                              | 20.63 (4.60)     | 20.54 (4.47)     | 20.83 (4.56)     | 20.46 (4.34)     | 0.425             |
| Polyunsaturated (g/day)                  | 16.39 (6.22)                              | 17.39 (6.03)     | 17.95 (6.42)     | 18.61 (6.79)     | 19.20 (7.23)     | <b>&lt;0.001*</b> |
| Polyunsaturated (% of energy intake)     | 6.78 (1.94)                               | 6.83 (1.82)      | 6.80 (1.84)      | 6.88 (1.84)      | 6.90 (1.92)      | 0.537             |
| Carbohydrate (g/day)                     | 219.24 (65.95)                            | 231.52 (66.90)   | 241.38 (70.99)   | 245.04 (72.79)   | 256.66 (78.74)   | <b>&lt;0.001*</b> |
| Carbohydrate (% of energy intake)        | 40.47 (7.13)                              | 40.29 (6.70)     | 40.52 (6.67)     | 40.28 (7.09)     | 40.89 (6.69)     | 0.219             |
| Fiber (g/day)                            | 27.99 (9.33)                              | 26.62 (8.54)     | 26.30 (8.37)     | 25.18 (8.40)     | 23.91 (7.91)     | <b>&lt;0.001*</b> |
| Simple sugars (g/day)                    | 5.41 (10.66)                              | 6.02 (10.91)     | 6.47 (10.87)     | 7.03 (12.60)     | 8.59 (14.26)     | <b>&lt;0.001*</b> |
| Sodium (mg/day)                          | 2149.64 (707.04)                          | 2329.08 (721.47) | 2456.72 (761.43) | 2502.99 (763.87) | 2582.58 (840.11) | <b>&lt;0.001*</b> |
| Glycemic Index                           | 54.14 (4.91)                              | 54.20 (5.02)     | 53.95 (4.83)     | 53.58 (5.55)     | 53.53 (5.40)     | <b>0.002*</b>     |
| Glycemic Load                            | 120.10 (42.20)                            | 126.87 (43.01)   | 131.54 (44.53)   | 132.71 (45.94)   | 138.74 (48.45)   | <b>&lt;0.001*</b> |
| Omega-3 (g/day)                          | 0.95 (0.51)                               | 0.91 (0.48)      | 0.91 (0.47)      | 0.84 (0.45)      | 0.82 (0.46)      | <b>&lt;0.001*</b> |

Data shown as "mean (standard deviation, SD)". Significant ANOVA p-values (< 0.05) shown in bold. \* Significant change in Q5 compared to Q1 (Tukey's p-value < 0.05).

**Table S3. Mean values of nutritional markers across quintiles of UPF intake according to the IARC classification.**

|                                          | IARC quintiles of UPF intake (% of g/day) |                  |                  |                  |                  | p                 |
|------------------------------------------|-------------------------------------------|------------------|------------------|------------------|------------------|-------------------|
|                                          | Q1 (lowest)                               | Q2               | Q3               | Q4               | Q5 (highest)     |                   |
| n                                        | 1128                                      | 1127             | 1127             | 1127             | 1127             |                   |
| UPF consumption (% of g/day)             | 29.58 (5.12)                              | 39.16 (1.96)     | 45.45 (1.69)     | 51.95 (2.16)     | 63.31 (6.23)     |                   |
| Energy intake (kcal/day)                 | 2121.92 (486.27)                          | 2258.44 (493.28) | 2373.94 (534.43) | 2437.38 (536.35) | 2561.76 (600.21) | <b>&lt;0.001*</b> |
| Protein (g/day)                          | 91.39 (20.64)                             | 97.09 (20.96)    | 98.84 (22.50)    | 99.07 (21.61)    | 98.06 (23.34)    | <b>&lt;0.001*</b> |
| Protein (% of energy intake)             | 17.46 (2.83)                              | 17.41 (2.64)     | 16.86 (2.71)     | 16.50 (2.79)     | 15.52 (2.65)     | <b>&lt;0.001*</b> |
| Total fat (g/day)                        | 96.14 (26.97)                             | 101.18 (26.03)   | 104.89 (28.06)   | 106.01 (29.44)   | 109.19 (31.09)   | <b>&lt;0.001*</b> |
| Total fat (% of energy intake)           | 40.68 (6.68)                              | 40.40 (6.24)     | 39.80 (6.39)     | 39.11 (6.63)     | 38.39 (6.57)     | <b>&lt;0.001*</b> |
| Saturated fat (g/day)                    | 22.48 (6.96)                              | 24.83 (7.23)     | 26.52 (8.11)     | 27.33 (8.40)     | 29.30 (9.79)     | <b>&lt;0.001*</b> |
| Saturated fat (% of energy intake)       | 9.49 (1.82)                               | 9.89 (1.84)      | 10.03 (2.02)     | 10.07 (2.04)     | 10.26 (2.20)     | <b>&lt;0.001*</b> |
| Monounsaturated fat (g/day)              | 51.01 (16.32)                             | 52.87 (15.13)    | 54.30 (15.90)    | 54.50 (16.70)    | 55.38 (16.70)    | <b>&lt;0.001*</b> |
| Monounsaturated fat (% of energy intake) | 21.57 (4.94)                              | 21.16 (4.50)     | 20.66 (4.50)     | 20.14 (4.53)     | 19.54 (4.35)     | <b>&lt;0.001*</b> |
| Polyunsaturated (g/day)                  | 17.39 (6.38)                              | 17.71 (6.11)     | 18.11 (6.63)     | 17.98 (6.61)     | 18.36 (7.28)     | <b>0.006*</b>     |
| Polyunsaturated (% of energy intake)     | 7.33 (1.99)                               | 7.02 (1.75)      | 6.82 (1.79)      | 6.61 (1.84)      | 6.41 (1.87)      | <b>&lt;0.001*</b> |
| Carbohydrate (g/day)                     | 216.21 (63.95)                            | 228.88 (67.04)   | 242.35 (71.87)   | 248.60 (72.39)   | 257.78 (78.07)   | <b>&lt;0.001*</b> |
| Carbohydrate (% of energy intake)        | 40.66 (6.81)                              | 40.31 (6.66)     | 40.66 (6.78)     | 40.68 (6.96)     | 40.14 (7.09)     | 0.203             |
| Fiber (g/day)                            | 29.95 (8.93)                              | 27.68 (8.53)     | 26.40 (8.17)     | 24.52 (7.51)     | 21.43 (7.43)     | <b>&lt;0.001*</b> |
| Simple sugars (g/day)                    | 3.98 (8.39)                               | 4.78 (9.07)      | 6.91 (12.10)     | 7.78 (12.99)     | 10.09 (15.08)    | <b>&lt;0.001*</b> |
| Sodium (mg/day)                          | 2051.39 (646.48)                          | 2280.83 (687.74) | 2444.22 (724.17) | 2536.30 (751.53) | 2708.37 (879.06) | <b>&lt;0.001*</b> |
| Glycemic Index                           | 52.99 (4.82)                              | 53.62 (4.89)     | 54.19 (4.93)     | 54.40 (5.21)     | 54.21 (5.75)     | <b>&lt;0.001*</b> |
| Glycemic Load                            | 115.34 (37.95)                            | 123.84 (41.13)   | 132.62 (45.11)   | 136.69 (46.37)   | 141.47 (50.13)   | <b>&lt;0.001*</b> |
| Omega-3 (g/day)                          | 1.00 (0.50)                               | 0.95 (0.48)      | 0.90 (0.48)      | 0.85 (0.45)      | 0.72 (0.41)      | <b>&lt;0.001*</b> |

Data shown as "mean (standard deviation, SD)". Significant ANOVA p-values (< 0.05) shown in bold. \* Significant change in Q5 compared to Q1 (Tukey's p-value < 0.05).

**Table S4. Mean values of nutritional markers across quintiles of UPF intake according to the IFIC classification.**

|                                          | IFIC quintiles of UPF intake (% of g/day) |                  |                  |                  |                  | p                 |
|------------------------------------------|-------------------------------------------|------------------|------------------|------------------|------------------|-------------------|
|                                          | Q1 (lowest)                               | Q2               | Q3               | Q4               | Q5 (highest)     |                   |
| n                                        | 1128                                      | 1127             | 1127             | 1127             | 1127             |                   |
| UPF consumption (% of g/day)             | 7.03 (2.24)                               | 12.51 (1.37)     | 17.53 (1.58)     | 24.10 (2.30)     | 37.88 (8.32)     |                   |
| Energy intake (kcal/day)                 | 2127.83 (486.77)                          | 2280.63 (512.72) | 2328.17 (515.92) | 2448.52 (537.93) | 2568.29 (599.50) | <b>&lt;0.001*</b> |
| Protein (g/day)                          | 93.23 (21.32)                             | 97.80 (21.33)    | 97.64 (21.63)    | 98.68 (21.87)    | 97.08 (23.45)    | <b>&lt;0.001*</b> |
| Protein (% of energy intake)             | 17.73 (2.75)                              | 17.38 (2.65)     | 16.99 (2.65)     | 16.35 (2.77)     | 15.31 (2.60)     | <b>&lt;0.001*</b> |
| Total fat (g/day)                        | 92.67 (26.84)                             | 101.63 (27.15)   | 103.75 (27.03)   | 108.46 (28.67)   | 110.91 (30.26)   | <b>&lt;0.001*</b> |
| Total fat (% of energy intake)           | 39.15 (7.08)                              | 40.12 (6.34)     | 40.19 (6.47)     | 39.90 (6.29)     | 39.01 (6.49)     | <b>&lt;0.001</b>  |
| Saturated fat (g/day)                    | 22.26 (7.05)                              | 25.36 (7.90)     | 26.18 (7.70)     | 27.71 (8.49)     | 28.93 (9.49)     | <b>&lt;0.001*</b> |
| Saturated fat (% of energy intake)       | 9.38 (1.92)                               | 9.98 (2.01)      | 10.11 (1.89)     | 10.16 (1.98)     | 10.11 (2.11)     | <b>&lt;0.001*</b> |
| Monounsaturated fat (g/day)              | 48.91 (16.15)                             | 52.94 (15.76)    | 53.57 (15.46)    | 55.91 (16.19)    | 56.74 (16.41)    | <b>&lt;0.001*</b> |
| Monounsaturated fat (% of energy intake) | 20.67 (5.08)                              | 20.92 (4.52)     | 20.82 (4.62)     | 20.62 (4.40)     | 20.05 (4.41)     | <b>&lt;0.001*</b> |
| Polyunsaturated (g/day)                  | 16.52 (6.29)                              | 17.62 (6.26)     | 17.97 (6.31)     | 18.52 (6.70)     | 18.91 (7.25)     | <b>&lt;0.001*</b> |
| Polyunsaturated (% of energy intake)     | 6.95 (2.00)                               | 6.93 (1.84)      | 6.92 (1.82)      | 6.78 (1.83)      | 6.60 (1.86)      | <b>&lt;0.001*</b> |
| Carbohydrate (g/day)                     | 227.44 (68.34)                            | 236.71 (69.93)   | 237.93 (71.79)   | 245.04 (72.23)   | 246.70 (77.42)   | <b>&lt;0.001*</b> |
| Carbohydrate (% of energy intake)        | 42.60 (7.13)                              | 41.31 (6.66)     | 40.61 (6.54)     | 39.78 (6.38)     | 38.15 (6.77)     | <b>&lt;0.001*</b> |
| Fiber (g/day)                            | 28.77 (9.22)                              | 27.36 (8.60)     | 26.36 (8.44)     | 25.18 (7.95)     | 22.32 (7.45)     | <b>&lt;0.001*</b> |
| Simple sugars (g/day)                    | 4.72 (9.92)                               | 6.25 (11.48)     | 7.03 (12.09)     | 7.49 (12.94)     | 8.04 (12.98)     | <b>&lt;0.001*</b> |
| Sodium (mg/day)                          | 2154.59 (703.01)                          | 2348.99 (728.31) | 2404.92 (755.39) | 2514.56 (750.38) | 2597.94 (854.90) | <b>&lt;0.001*</b> |
| Glycemic Index                           | 54.82 (4.78)                              | 54.16 (4.99)     | 53.91 (5.01)     | 53.84 (5.06)     | 52.67 (5.67)     | <b>&lt;0.001*</b> |
| Glycemic Load                            | 125.92 (43.53)                            | 129.52 (44.04)   | 129.60 (45.04)   | 133.20 (45.29)   | 131.71 (48.18)   | <b>0.002*</b>     |
| Omega-3 (g/day)                          | 0.90 (0.49)                               | 0.92 (0.48)      | 0.90 (0.48)      | 0.87 (0.46)      | 0.82 (0.45)      | <b>&lt;0.001*</b> |

Data shown as "mean (standard deviation, SD)". Significant ANOVA p-values (< 0.05) shown in bold. \* Significant change in Q5 compared to Q1 (Tukey's p-value < 0.05).

**Table S5. Mean values of nutritional markers across quintiles of UPF intake according to the UNC classification.**

|                                          | UNC quintiles of UPF intake (% of g/day) |                  |                  |                  |                  | p                 |
|------------------------------------------|------------------------------------------|------------------|------------------|------------------|------------------|-------------------|
|                                          | Q1 (lowest)                              | Q2               | Q3               | Q4               | Q5 (highest)     |                   |
| n                                        | 1128                                     | 1127             | 1127             | 1127             | 1127             |                   |
| UPF consumption (% of g/day)             | 5.79 (2.09)                              | 11.59 (1.56)     | 17.04 (1.69)     | 24.15 (2.54)     | 38.88 (8.87)     |                   |
| Energy intake (kcal/day)                 | 2042.15 (473.92)                         | 2239.65 (491.99) | 2364.28 (487.76) | 2481.44 (530.53) | 2626.00 (583.13) | <b>&lt;0.001*</b> |
| Protein (g/day)                          | 93.32 (21.26)                            | 97.59 (21.74)    | 98.54 (21.50)    | 98.16 (22.61)    | 96.83 (22.53)    | <b>&lt;0.001*</b> |
| Protein (% of energy intake)             | 18.50 (2.81)                             | 17.60 (2.61)     | 16.81 (2.45)     | 15.95 (2.43)     | 14.89 (2.28)     | <b>&lt;0.001*</b> |
| Total fat (g/day)                        | 90.60 (27.09)                            | 100.60 (26.83)   | 104.99 (27.35)   | 109.75 (27.55)   | 111.48 (29.76)   | <b>&lt;0.001*</b> |
| Total fat (% of energy intake)           | 39.74 (6.98)                             | 40.44 (6.56)     | 39.95 (6.38)     | 39.92 (6.24)     | 38.33 (6.42)     | <b>&lt;0.001*</b> |
| Saturated fat (g/day)                    | 21.65 (7.20)                             | 25.18 (7.77)     | 26.60 (8.03)     | 28.11 (8.21)     | 28.92 (9.09)     | <b>&lt;0.001*</b> |
| Saturated fat (% of energy intake)       | 9.49 (2.00)                              | 10.10 (2.06)     | 10.07 (1.92)     | 10.19 (1.95)     | 9.89 (2.01)      | <b>&lt;0.001*</b> |
| Monounsaturated fat (g/day)              | 47.75 (16.05)                            | 52.02 (15.61)    | 54.30 (15.63)    | 56.68 (15.49)    | 57.33 (16.48)    | <b>&lt;0.001*</b> |
| Monounsaturated fat (% of energy intake) | 20.96 (5.03)                             | 20.93 (4.67)     | 20.72 (4.50)     | 20.69 (4.42)     | 19.78 (4.36)     | <b>&lt;0.001*</b> |
| Polyunsaturated (g/day)                  | 16.24 (6.35)                             | 17.36 (6.23)     | 18.18 (6.35)     | 18.78 (6.73)     | 18.99 (7.05)     | <b>&lt;0.001*</b> |
| Polyunsaturated (% of energy intake)     | 7.08 (1.99)                              | 6.95 (1.89)      | 6.90 (1.89)      | 6.78 (1.81)      | 6.48 (1.74)      | <b>&lt;0.001*</b> |
| Carbohydrate (g/day)                     | 210.67 (61.68)                           | 229.33 (67.11)   | 243.79 (67.51)   | 252.28 (75.36)   | 257.77 (78.54)   | <b>&lt;0.001*</b> |
| Carbohydrate (% of energy intake)        | 41.23 (6.93)                             | 40.77 (6.65)     | 41.11 (6.80)     | 40.33 (6.75)     | 39.00 (6.94)     | <b>&lt;0.001*</b> |
| Fiber (g/day)                            | 30.40 (9.66)                             | 27.38 (8.73)     | 25.87 (7.63)     | 24.29 (7.54)     | 22.04 (6.92)     | <b>&lt;0.001*</b> |
| Simple sugars (g/day)                    | 4.15 (8.94)                              | 5.75 (11.23)     | 6.65 (11.76)     | 8.15 (13.54)     | 8.83 (13.31)     | <b>&lt;0.001*</b> |
| Sodium (mg/day)                          | 2023.09 (633.59)                         | 2289.43 (688.50) | 2416.17 (717.57) | 2576.43 (763.76) | 2716.00 (863.13) | <b>&lt;0.001*</b> |
| Glycemic Index                           | 52.08 (4.49)                             | 53.31 (4.53)     | 54.33 (5.09)     | 55.10 (5.23)     | 54.58 (5.78)     | <b>&lt;0.001*</b> |
| Glycemic Load                            | 110.47 (35.98)                           | 122.99 (40.05)   | 133.34 (41.60)   | 140.54 (48.03)   | 142.62 (51.15)   | <b>&lt;0.001*</b> |
| Omega-3 (g/day)                          | 0.92 (0.50)                              | 0.93 (0.48)      | 0.89 (0.48)      | 0.87 (0.46)      | 0.80 (0.44)      | <b>&lt;0.001*</b> |

Data shown as "mean (standard deviation, SD)". Significant ANOVA p-values (< 0.05) shown in bold. \* Significant change in Q5 compared to Q1 (Tukey's p-value < 0.05).

**Table S6. Mean values of cardiometabolic and sociodemographic markers across quintiles of UPF intake according to the NOVA classification.**

|                              | NOVA quintiles of UPF intake (% of g/day) |                |                |                |                | p                 |
|------------------------------|-------------------------------------------|----------------|----------------|----------------|----------------|-------------------|
|                              | Q1 (lowest)                               | Q2             | Q3             | Q4             | Q5 (highest)   |                   |
| n                            | 1128                                      | 1127           | 1127           | 1127           | 1127           |                   |
| UPF consumption (% of g/day) | 2.03 (0.74)                               | 4.01 (0.52)    | 5.97 (0.65)    | 9.00 (1.17)    | 18.31 (7.54)   |                   |
| Female sex (%)               | 649 (57.5)                                | 577 (51.2)     | 543 (48.2)     | 513 (45.5)     | 454 (40.3)     | <b>&lt;0.001*</b> |
| Age (years)                  | 66.27 (4.60)                              | 65.50 (4.82)   | 64.95 (4.75)   | 64.57 (4.89)   | 64.03 (5.21)   | <b>&lt;0.001*</b> |
| Smoking status (%)           |                                           |                |                |                |                | <b>&lt;0.001</b>  |
| Current smoker               | 113 (10.0)                                | 126 (11.2)     | 124 (11.1)     | 136 (12.2)     | 166 (14.8)     |                   |
| Former smoker                | 465 (41.3)                                | 468 (41.7)     | 510 (45.5)     | 516 (46.2)     | 495 (44.0)     |                   |
| Never smoker                 | 547 (48.6)                                | 528 (47.1)     | 488 (43.5)     | 466 (41.7)     | 463 (41.2)     |                   |
| Type II diabetes (%)         | 334 (29.7)                                | 313 (27.9)     | 301 (26.8)     | 295 (26.2)     | 296 (26.3)     | 0.316             |
| Hypertension (%)             | 924 (82.5)                                | 959 (85.7)     | 958 (85.6)     | 925 (82.8)     | 947 (84.3)     | 0.106             |
| Physical activity (%)        |                                           |                |                |                |                | 0.2               |
| Low                          | 531 (50.0)                                | 561 (52.8)     | 559 (52.0)     | 585 (54.2)     | 618 (56.5)     |                   |
| Medium                       | 469 (44.1)                                | 437 (41.1)     | 451 (41.9)     | 437 (40.5)     | 416 (38.0)     |                   |
| High                         | 63 (5.9)                                  | 64 (6.0)       | 66 (6.1)       | 57 (5.3)       | 60 (5.5)       |                   |
| MedDiet adherence (p17)      | 9.75 (2.55)                               | 8.93 (2.58)    | 8.55 (2.44)    | 8.07 (2.45)    | 7.47 (2.59)    | <b>&lt;0.001*</b> |
| Weight (kg)                  | 83.76 (11.77)                             | 85.76 (12.80)  | 86.76 (12.81)  | 87.52 (12.97)  | 88.69 (13.40)  | <b>&lt;0.001*</b> |
| BMI (kg/m <sup>2</sup> )     | 32.12 (3.27)                              | 32.57 (3.41)   | 32.61 (3.42)   | 32.59 (3.52)   | 32.84 (3.53)   | <b>&lt;0.001*</b> |
| Waist circumference (cm)     | 105.77 (8.99)                             | 107.10 (9.52)  | 107.58 (9.30)  | 108.32 (9.95)  | 108.99 (9.82)  | <b>&lt;0.001*</b> |
| Glucose (mg/dL)              | 113.05 (27.32)                            | 114.14 (28.94) | 113.00 (27.36) | 113.19 (27.57) | 112.40 (27.72) | 0.68              |
| HbA1c (% mmol/mol)           | 6.10 (0.80)                               | 6.11 (0.83)    | 6.08 (0.79)    | 6.10 (0.90)    | 6.10 (0.86)    | 0.922             |
| Triglycerides (mg/dL)        | 137.61 (52.35)                            | 140.89 (53.85) | 143.24 (52.23) | 143.03 (53.66) | 143.29 (53.24) | <b>0.047</b>      |
| Total cholesterol (mg/dL)    | 197.25 (37.31)                            | 195.87 (37.22) | 197.80 (37.34) | 195.77 (36.54) | 192.90 (38.04) | <b>0.02*</b>      |
| LDL cholesterol (mg/dL)      | 120.07 (33.49)                            | 119.14 (32.52) | 120.90 (32.41) | 119.55 (32.37) | 117.43 (33.08) | 0.135             |
| HDL cholesterol (mg/dL)      | 49.65 (11.93)                             | 48.55 (10.90)  | 48.24 (11.38)  | 47.63 (11.97)  | 46.83 (11.72)  | <b>&lt;0.001*</b> |
| Creatinine (mg/dL)           | 0.82 (0.19)                               | 0.83 (0.21)    | 0.83 (0.19)    | 0.84 (0.21)    | 0.86 (0.21)    | <b>&lt;0.001*</b> |
| Systolic BP (mmHg)           | 140.10 (17.39)                            | 140.21 (16.89) | 140.06 (16.48) | 138.82 (17.23) | 138.48 (16.48) | <b>0.033</b>      |
| Diastolic BP (mmHg)          | 80.63 (9.55)                              | 80.50 (9.75)   | 80.88 (10.07)  | 80.95 (9.78)   | 80.93 (10.40)  | 0.759             |

Data shown as "mean (standard deviation, SD)" for continuous variables and as "number of subjects (percentage)" for categorical variables. Significant ANOVA p-values (< 0.05) shown in bold. \* Significant change in Q5 compared to Q1 (Tukey's p-value < 0.05). BMI: Body Mass Index, BP: blood pressure, HbA1c: glycosylated hemoglobin, HDL: high-density lipoprotein, LDL: low-density lipoprotein, MedDiet: Mediterranean diet.



**Table S7. Mean values of cardiometabolic and sociodemographic markers across quintiles of UPF intake according to the IARC classification.**

|                              | IARC quintiles of UPF intake (% of g/day) |                |                |                |                | p                 |
|------------------------------|-------------------------------------------|----------------|----------------|----------------|----------------|-------------------|
|                              | Q1 (lowest)                               | Q2             | Q3             | Q4             | Q5 (highest)   |                   |
| n                            | 1128                                      | 1127           | 1127           | 1127           | 1127           |                   |
| UPF consumption (% of g/day) | 29.58 (5.12)                              | 39.16 (1.96)   | 45.45 (1.69)   | 51.95 (2.16)   | 63.31 (6.23)   |                   |
| Female sex (%)               | 771 (68.4)                                | 653 (57.9)     | 571 (50.7)     | 476 (42.2)     | 265 (23.5)     | <b>&lt;0.001*</b> |
| Age (years)                  | 65.99 (4.49)                              | 65.77 (4.88)   | 65.40 (4.72)   | 64.63 (4.95)   | 63.52 (5.12)   | <b>&lt;0.001*</b> |
| Smoking status (%)           |                                           |                |                |                |                | <b>&lt;0.001</b>  |
| Current smoker               | 93 (8.3)                                  | 115 (10.2)     | 127 (11.3)     | 136 (12.2)     | 194 (17.3)     |                   |
| Former smoker                | 404 (35.8)                                | 434 (38.6)     | 495 (44.2)     | 540 (48.3)     | 581 (51.7)     |                   |
| Never smoker                 | 630 (55.9)                                | 574 (51.1)     | 497 (44.4)     | 443 (39.6)     | 348 (31.0)     |                   |
| Type II diabetes (%)         | 313 (27.8)                                | 308 (27.4)     | 320 (28.5)     | 301 (26.8)     | 297 (26.4)     | 0.823             |
| Hypertension (%)             | 947 (84.2)                                | 949 (84.8)     | 932 (83.1)     | 948 (85.1)     | 937 (83.7)     | 0.715             |
| Physical activity (%)        |                                           |                |                |                |                | <b>&lt;0.001</b>  |
| Low                          | 552 (50.7)                                | 546 (50.8)     | 587 (54.5)     | 559 (52.3)     | 610 (57.2)     |                   |
| Medium                       | 488 (44.9)                                | 478 (44.5)     | 424 (39.4)     | 439 (41.1)     | 381 (35.7)     |                   |
| High                         | 48 (4.4)                                  | 50 (4.7)       | 66 (6.1)       | 70 (6.6)       | 76 (7.1)       |                   |
| MedDiet adherence (p17)      | 9.64 (2.47)                               | 9.12 (2.53)    | 8.58 (2.58)    | 8.18 (2.42)    | 7.26 (2.54)    | <b>&lt;0.001*</b> |
| Weight (kg)                  | 83.36 (12.54)                             | 84.48 (12.15)  | 86.24 (12.60)  | 87.26 (12.70)  | 91.15 (12.95)  | <b>&lt;0.001*</b> |
| BMI (kg/m <sup>2</sup> )     | 32.59 (3.50)                              | 32.46 (3.44)   | 32.63 (3.49)   | 32.41 (3.36)   | 32.65 (3.40)   | 0.35              |
| Waist circumference (cm)     | 105.74 (9.74)                             | 106.43 (9.41)  | 107.51 (9.53)  | 108.15 (9.57)  | 109.93 (9.10)  | <b>&lt;0.001*</b> |
| Glucose (mg/dL)              | 112.12 (26.77)                            | 111.18 (25.20) | 113.57 (29.52) | 114.25 (28.23) | 114.67 (28.87) | <b>0.013</b>      |
| HbA1c (% mmol/mol)           | 6.09 (0.79)                               | 6.10 (0.80)    | 6.09 (0.86)    | 6.10 (0.83)    | 6.11 (0.90)    | 0.949             |
| Triglycerides (mg/dL)        | 139.55 (51.35)                            | 141.63 (53.22) | 139.36 (52.24) | 140.90 (53.12) | 146.62 (55.23) | <b>0.007*</b>     |
| Total cholesterol (mg/dL)    | 196.97 (37.92)                            | 199.10 (37.63) | 195.68 (36.27) | 194.12 (36.52) | 193.70 (38.02) | <b>0.003</b>      |
| LDL cholesterol (mg/dL)      | 120.03 (34.18)                            | 121.69 (32.87) | 119.36 (31.95) | 117.71 (31.56) | 118.30 (33.20) | <b>0.037</b>      |
| HDL cholesterol (mg/dL)      | 49.03 (11.51)                             | 49.09 (11.73)  | 48.46 (11.61)  | 48.25 (11.77)  | 46.08 (11.24)  | <b>&lt;0.001*</b> |
| Creatinine (mg/dL)           | 0.81 (0.20)                               | 0.82 (0.21)    | 0.83 (0.20)    | 0.85 (0.20)    | 0.88 (0.20)    | <b>&lt;0.001*</b> |
| Systolic BP (mmHg)           | 139.00 (17.45)                            | 140.31 (17.37) | 139.21 (16.84) | 140.03 (16.24) | 139.13 (16.61) | 0.239             |
| Diastolic BP (mmHg)          | 79.82 (9.66)                              | 80.24 (9.77)   | 80.73 (9.89)   | 81.55 (9.94)   | 81.55 (10.20)  | <b>&lt;0.001*</b> |

Data shown as "mean (standard deviation, SD)" for continuous variables and as "number of subjects (percentage)" for categorical variables. Significant ANOVA p-values (< 0.05) shown in bold. \* Significant change in Q5 compared to Q1 (Tukey's p-value < 0.05). BMI: Body Mass Index, BP: blood pressure, HbA1c: glycosylated hemoglobin, HDL: high-density lipoprotein, LDL: low-density lipoprotein, MedDiet: Mediterranean diet.

**Table S8. Mean values of cardiometabolic and sociodemographic markers across quintiles of UPF intake according to the IFIC classification.**

|                              | IFIC quintiles of UPF intake (% of g/day) |                |                |                |                | p                 |
|------------------------------|-------------------------------------------|----------------|----------------|----------------|----------------|-------------------|
|                              | Q1 (lowest)                               | Q2             | Q3             | Q4             | Q5 (highest)   |                   |
| n                            | 1128                                      | 1127           | 1127           | 1127           | 1127           |                   |
| UPF consumption (% of g/day) | 7.03 (2.24)                               | 12.51 (1.37)   | 17.53 (1.58)   | 24.10 (2.30)   | 37.88 (8.32)   |                   |
| Female sex (%)               | 817 (72.4)                                | 727 (64.5)     | 554 (49.2)     | 415 (36.8)     | 223 (19.8)     | <b>&lt;0.001*</b> |
| Age (years)                  | 66.31 (4.37)                              | 65.83 (4.70)   | 65.09 (4.99)   | 64.54 (5.03)   | 63.55 (5.00)   | <b>&lt;0.001*</b> |
| Smoking status (%)           |                                           |                |                |                |                | <b>&lt;0.001</b>  |
| Current smoker               | 102 (9.1)                                 | 108 (9.6)      | 139 (12.4)     | 136 (12.1)     | 180 (16.1)     |                   |
| Former smoker                | 352 (31.3)                                | 412 (36.7)     | 490 (43.6)     | 563 (50.3)     | 637 (56.8)     |                   |
| Never smoker                 | 671 (59.6)                                | 602 (53.7)     | 494 (44.0)     | 421 (37.6)     | 304 (27.1)     |                   |
| Type II diabetes (%)         | 395 (35.1)                                | 312 (27.7)     | 276 (24.6)     | 276 (24.6)     | 280 (24.9)     | <b>&lt;0.001</b>  |
| Hypertension (%)             | 962 (85.8)                                | 933 (83.2)     | 944 (84.4)     | 934 (83.3)     | 940 (84.2)     | 0.449             |
| Physical activity (%)        |                                           |                |                |                |                | <b>0.004</b>      |
| Low                          | 579 (53.7)                                | 607 (56.3)     | 539 (50.6)     | 554 (51.2)     | 575 (53.7)     |                   |
| Medium                       | 450 (41.7)                                | 424 (39.3)     | 468 (43.9)     | 445 (41.2)     | 423 (39.5)     |                   |
| High                         | 49 (4.5)                                  | 47 (4.4)       | 59 (5.5)       | 82 (7.6)       | 73 (6.8)       |                   |
| MedDiet adherence (p17)      | 9.28 (2.53)                               | 8.77 (2.53)    | 8.65 (2.57)    | 8.37 (2.62)    | 7.70 (2.68)    | <b>&lt;0.001*</b> |
| Weight (kg)                  | 82.20 (11.74)                             | 84.36 (12.14)  | 86.23 (12.82)  | 88.40 (12.90)  | 91.30 (12.76)  | <b>&lt;0.001*</b> |
| BMI (kg/m <sup>2</sup> )     | 32.48 (3.48)                              | 32.65 (3.47)   | 32.52 (3.48)   | 32.52 (3.41)   | 32.57 (3.36)   | 0.81              |
| Waist circumference (cm)     | 105.18 (9.60)                             | 106.76 (9.42)  | 107.17 (9.70)  | 108.58 (9.29)  | 110.08 (9.17)  | <b>&lt;0.001*</b> |
| Glucose (mg/dL)              | 115.24 (29.87)                            | 111.71 (26.07) | 112.11 (27.69) | 113.24 (27.86) | 113.49 (27.20) | <b>0.024</b>      |
| HbA1c (% mmol/mol)           | 6.21 (0.90)                               | 6.10 (0.77)    | 6.08 (0.80)    | 6.05 (0.84)    | 6.05 (0.86)    | <b>&lt;0.001*</b> |
| Triglycerides (mg/dL)        | 140.83 (51.94)                            | 142.60 (52.10) | 140.34 (53.46) | 140.97 (54.11) | 143.31 (53.87) | 0.627             |
| Total cholesterol (mg/dL)    | 196.52 (37.22)                            | 198.29 (37.40) | 195.42 (36.28) | 194.90 (36.76) | 194.44 (38.83) | 0.106             |
| LDL cholesterol (mg/dL)      | 119.11 (33.18)                            | 121.35 (33.13) | 119.38 (31.96) | 118.91 (31.81) | 118.34 (33.78) | <b>0.238</b>      |
| HDL cholesterol (mg/dL)      | 49.24 (11.26)                             | 48.42 (11.20)  | 47.99 (11.93)  | 47.81 (11.96)  | 47.45 (11.67)  | <b>0.003*</b>     |
| Creatinine (mg/dL)           | 0.79 (0.19)                               | 0.81 (0.19)    | 0.84 (0.21)    | 0.86 (0.21)    | 0.88 (0.20)    | <b>&lt;0.001*</b> |
| Systolic BP (mmHg)           | 139.61 (17.70)                            | 139.38 (16.93) | 138.86 (16.68) | 139.27 (16.68) | 140.55 (16.49) | 0.184             |
| Diastolic BP (mmHg)          | 79.56 (9.40)                              | 80.09 (9.90)   | 80.98 (9.51)   | 81.19 (10.26)  | 82.08 (10.28)  | <b>&lt;0.001*</b> |

Data shown as "mean (standard deviation, SD)" for continuous variables and as "number of subjects (percentage)" for categorical variables. Significant ANOVA p-values (< 0.05) shown in bold. \* Significant change in Q5 compared to Q1 (Tukey's p-value < 0.05). BMI: Body Mass Index, BP: blood pressure, HbA1c: glycosylated hemoglobin, HDL: high-density lipoprotein, LDL: low-density lipoprotein, MedDiet: Mediterranean diet.

**Table S9. Mean values of cardiometabolic and sociodemographic markers across quintiles of UPF intake according to the UNC classification.**

|                              | UNC quintiles of UPF intake (% of g/day) |                |                |                |                | p                 |
|------------------------------|------------------------------------------|----------------|----------------|----------------|----------------|-------------------|
|                              | Q1 (lowest)                              | Q2             | Q3             | Q4             | Q5 (highest)   |                   |
| n                            | 1128                                     | 1127           | 1127           | 1127           | 1127           |                   |
| UPF consumption (% of g/day) | 5.79 (2.09)                              | 11.59 (1.56)   | 17.04 (1.69)   | 24.15 (2.54)   | 38.88 (8.87)   |                   |
| Female sex (%)               | 891 (79.0)                               | 750 (66.5)     | 547 (48.5)     | 360 (31.9)     | 188 (16.7)     | <b>&lt;0.001*</b> |
| Age (years)                  | 66.29 (4.43)                             | 65.95 (4.62)   | 65.29 (4.83)   | 64.33 (5.15)   | 63.46 (4.96)   | <b>&lt;0.001*</b> |
| Smoking status (%)           |                                          |                |                |                |                | <b>&lt;0.001</b>  |
| Current smoker               | 86 (7.6)                                 | 101 (9.0)      | 125 (11.2)     | 160 (14.3)     | 193 (17.2)     |                   |
| Former smoker                | 332 (29.5)                               | 402 (35.8)     | 494 (44.1)     | 584 (52.0)     | 642 (57.3)     |                   |
| Never smoker                 | 707 (62.8)                               | 621 (55.2)     | 501 (44.7)     | 378 (33.7)     | 285 (25.4)     |                   |
| Type II diabetes (%)         | 331 (29.4)                               | 320 (28.5)     | 315 (28.0)     | 298 (26.5)     | 275 (24.5)     | 0.081             |
| Hypertension (%)             | 945 (84.1)                               | 921 (82.5)     | 959 (85.5)     | 949 (84.7)     | 939 (84.2)     | 0.369             |
| Physical activity (%)        |                                          |                |                |                |                | <b>&lt;0.001</b>  |
| Low                          | 558 (51.3)                               | 597 (55.8)     | 584 (54.3)     | 584 (54.0)     | 531 (50.1)     |                   |
| Medium                       | 486 (44.7)                               | 427 (39.9)     | 421 (39.1)     | 432 (40.0)     | 444 (41.9)     |                   |
| High                         | 44 (4.0)                                 | 45 (4.2)       | 71 (6.6)       | 65 (6.0)       | 85 (8.0)       |                   |
| MedDiet adherence (p17)      | 10.07 (2.42)                             | 8.89 (2.37)    | 8.38 (2.51)    | 7.98 (2.54)    | 7.46 (2.57)    | <b>&lt;0.001*</b> |
| Weight (kg)                  | 82.18 (11.88)                            | 83.95 (12.24)  | 86.02 (12.46)  | 88.89 (12.92)  | 91.45 (12.64)  | <b>&lt;0.001*</b> |
| BMI (kg/m <sup>2</sup> )     | 32.63 (3.49)                             | 32.74 (3.51)   | 32.42 (3.43)   | 32.45 (3.36)   | 32.49 (3.39)   | 0.135             |
| Waist circumference (cm)     | 105.19 (9.75)                            | 106.31 (9.53)  | 107.24 (9.21)  | 109.02 (9.43)  | 109.99 (9.17)  | <b>&lt;0.001*</b> |
| Glucose (mg/dL)              | 112.35 (26.43)                           | 112.66 (28.43) | 113.38 (29.42) | 113.67 (27.53) | 113.72 (27.03) | 0.691             |
| HbA1c (% mmol/mol)           | 6.14 (0.81)                              | 6.13 (0.82)    | 6.09 (0.84)    | 6.08 (0.87)    | 6.05 (0.84)    | <b>0.044</b>      |
| Triglycerides (mg/dL)        | 139.91 (52.81)                           | 141.82 (52.62) | 139.95 (52.04) | 141.47 (53.44) | 144.90 (54.45) | 0.158             |
| Total cholesterol (mg/dL)    | 200.26 (37.22)                           | 197.55 (37.69) | 194.36 (36.55) | 193.61 (36.54) | 193.81 (38.18) | <b>&lt;0.001*</b> |
| LDL cholesterol (mg/dL)      | 122.37 (33.32)                           | 120.38 (33.46) | 118.25 (32.05) | 118.35 (31.96) | 117.75 (32.94) | <b>0.003*</b>     |
| HDL cholesterol (mg/dL)      | 49.91 (11.35)                            | 48.80 (11.43)  | 48.12 (11.67)  | 46.98 (11.90)  | 47.10 (11.49)  | <b>&lt;0.001*</b> |
| Creatinine (mg/dL)           | 0.79 (0.19)                              | 0.79 (0.19)    | 0.85 (0.22)    | 0.87 (0.21)    | 0.88 (0.19)    | <b>&lt;0.001*</b> |
| Systolic BP (mmHg)           | 138.02 (16.84)                           | 138.50 (17.25) | 140.09 (16.86) | 140.13 (16.89) | 140.94 (16.55) | <b>&lt;0.001*</b> |
| Diastolic BP (mmHg)          | 79.04 (9.57)                             | 79.97 (9.66)   | 80.31 (9.66)   | 82.22 (10.14)  | 82.36 (10.10)  | <b>&lt;0.001*</b> |

Data shown as “mean (standard deviation, SD)” for continuous variables and as “number of subjects (percentage)” for categorical variables. Significant ANOVA p-values (< 0.05) shown in bold. \* Significant change in Q5 compared to Q1 (Tukey's p-value < 0.05). BMI: Body Mass Index, BP: blood pressure, HbA1c: glycosylated hemoglobin, HDL: high-density lipoprotein, LDL: low-density lipoprotein, MedDiet: Mediterranean diet.

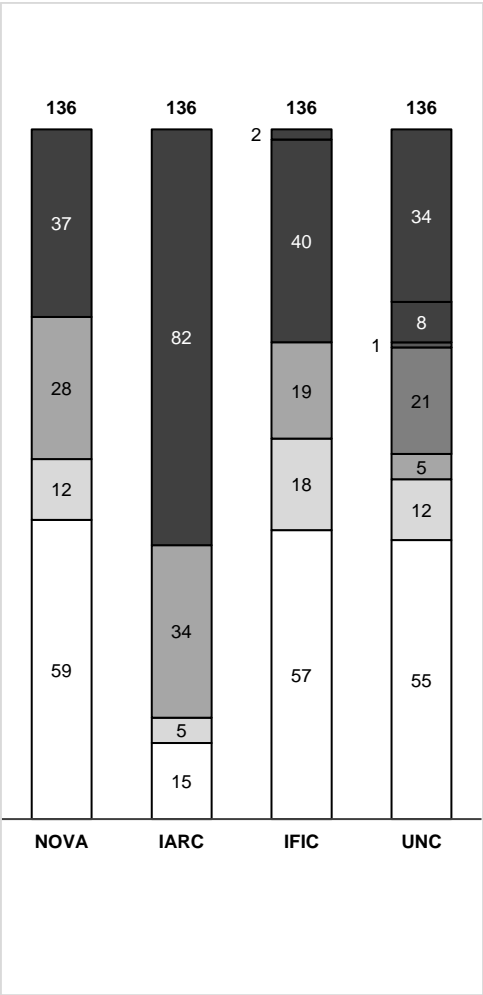

Figure S1. Number of food items from the PREDIMED-Plus food frequency questionnaire by processing group. Darker shades indicate higher processing group.
